# Supplementary material for: Prevalence of influenza and pneumococcal vaccination in chronic obstructive pulmonary disease patients in association with the occurrence of acute exacerbations
Source: PubMed Central journal article supplement — J Thorac Dis. 2020 Aug;12(8):4233–42. doi: 10.21037/jtd-20-814 (PMC7475525; doi:10.21037/jtd-20-814), 2020-08
Supplement: jtd-12-08-4233-dss.pdf [file jtd-12-08-4233-dss.pdf]

## Data Sharing Statement

|                     |                                                                                                                                                    |                                                            |
|---------------------|----------------------------------------------------------------------------------------------------------------------------------------------------|------------------------------------------------------------|
| <b>Article Info</b> | <a href="http://dx.doi.org/10.21037/jtd-20-814">http://dx.doi.org/10.21037/jtd-20-814</a> .                                                        |                                                            |
| <b>Item</b>         | <b>Question</b>                                                                                                                                    | <b>Authors' Response<br/>(place "-" if not applicable)</b> |
| 1                   | Would you like to share data collected for your study to others?                                                                                   | Yes                                                        |
| 2                   | If not, would you like to share the reason for your decision?                                                                                      | -                                                          |
| 3                   | What data in particular will be shared?                                                                                                            | Raw data if somebody is requiring for this data.           |
| 4                   | Any other documents will be share? Such as study protocol, statistical analysis plan, informed consent form, clinical study report, analytic code. | If anybody ask about it we can send it personally.         |
| 5                   | When will data availability begin?                                                                                                                 | From the manuscript is accepted.                           |
| 6                   | When will data availability end?                                                                                                                   | In one year                                                |
| 7                   | To whom will you share the data?                                                                                                                   | To researchers who are dealing with similar research.      |
| 8                   | For what type of analysis or purpose?                                                                                                              | To have a cooperation in this topic.                       |
| 9                   | How or where can the data/documents be obtained?                                                                                                   | For whom we allow to use our data by a written form.       |
| 10                  | Any other restrictions?                                                                                                                            | No other                                                   |
